# Supplementary material for: Excitation wavelength-dependent room temperature phosphorescence based on dual confinement of an organic–inorganic matrix for dynamic information encryption
Source: Royal Society of Chemistry journal article supplement (doi:10.1039/d5dt00123d), 2025-01-01
Supplement: d5dt00123d1.pdf [file d5dt00123d1.pdf]

## Supporting Information

### **Excitation Wavelength-Dependent Room Temperature Phosphorescence Based on Dual Confinements of Organic-Inorganic Matrix for Dynamic Information Encryption**

*Xianglong Zhao,<sup>‡a</sup> Shaoyue Shuai,<sup>‡a</sup> Runze Wang,<sup>a</sup> Feifei Peng,<sup>a</sup> Xianggui Kong,<sup>a,b</sup> Wenying Shi<sup>\*a,c</sup>*

*<sup>a</sup>State Key Laboratory of Chemical Resource Engineering, Beijing University of Chemical Technology, 15 Beisanhuan East Road, P. Box 98, 100029, Beijing (P. R. China).*

*<sup>b</sup>Quzhou Institute for Innovation in Resource Chemical Engineering, Zhejiang 324000, China.*

*<sup>c</sup>Qingyuan Innovation Laboratory, Quanzhou 362801, China.*

*\*E-mail: [shiwy@mail.buct.edu.cn](mailto:shiwy@mail.buct.edu.cn)*

*<sup>‡</sup> These authors contributed equally to this work.*

*<sup>†</sup> Electronic Supplementary Information (ESI) available. See DOI: 10.1039/x0xx00000x*

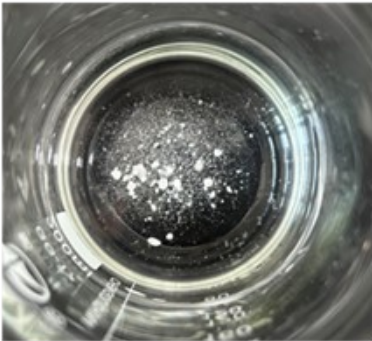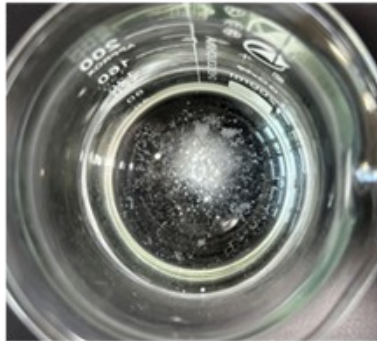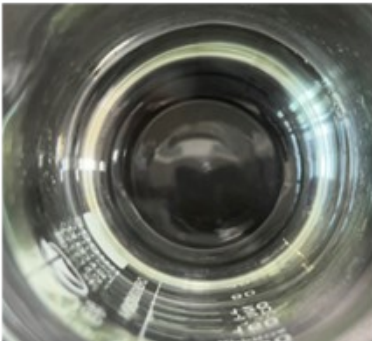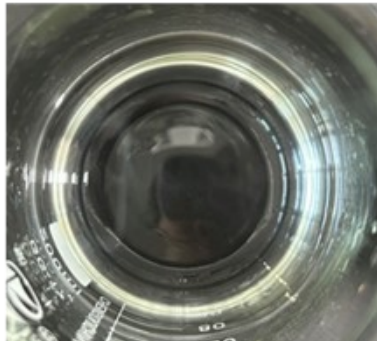

**Fig. S1.** Different dissolution temperatures were used to dissolve TA: (A) 30 °C; (B) 40 °C; (C) 50 °C; and (D) 60 °C.

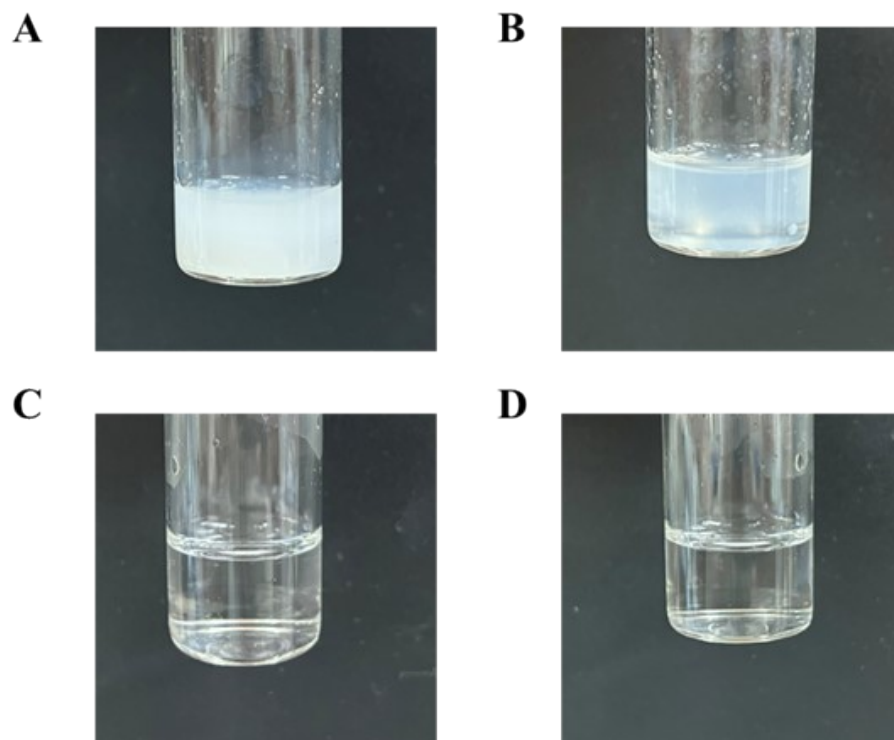

**Fig. S2.** CDs-LDHs were etched using different mass fractions of HCl, respectively (A) non-etching. (B) 5% HCl. (C) 10% HCl. (D) 15% HCl.

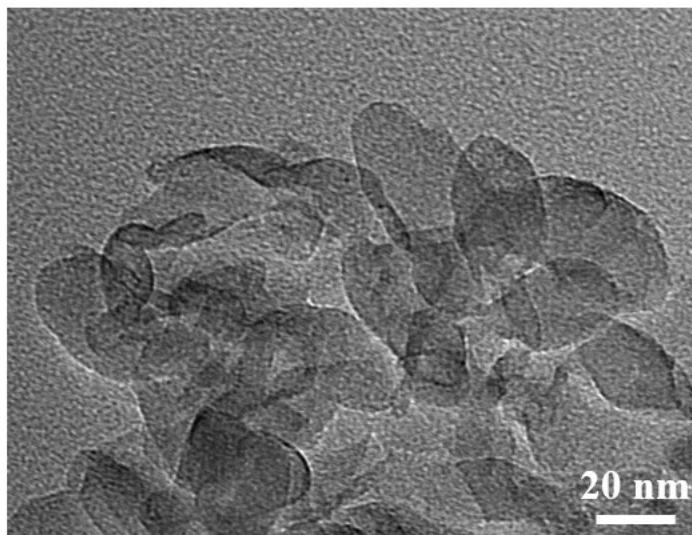

**Fig. S3.** TEM images of TA-LDHs.

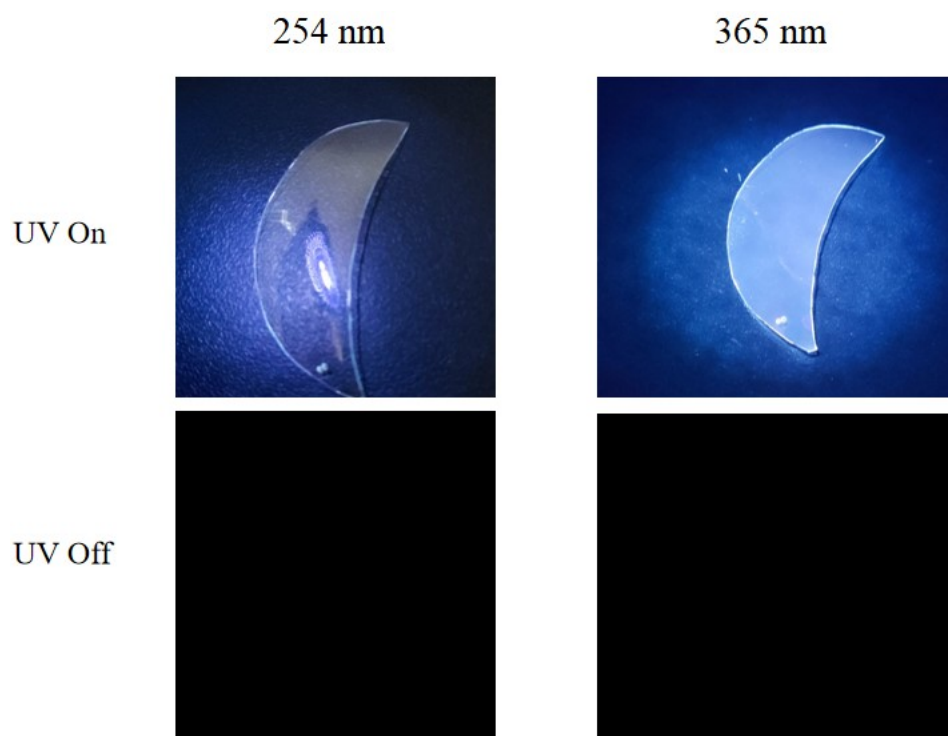

**Fig. S4.** Photographs of PVA before and after turning off the 254 nm and 365 nm UV lamp.

**Table S1.** The RTP decay and RTP quantum yield of CDs-LDHs and CDs-LDHs@PVA.

| <b>Sample</b>       | <b>QY (%)</b> | <b><math>\tau_{\text{ave}}</math> (ms)</b> |
|---------------------|---------------|--------------------------------------------|
| <b>CDs-LDHs</b>     | 4.15          | 127.11                                     |
| <b>CDs-LDHs@PVA</b> | 5.04          | 205.24                                     |
